# Supplementary material
Source: Copernicus journal article supplement (doi:10.5194/egusphere-2026-3616)
Supplement: Supplementary file 1 [file egusphere-2026-3616-supplement.pdf]

1 *Supplement of*

2 **Simultaneous measurements of gas- and aerosol-phase water-soluble**  
3 **organic nitrogen in the winter urban atmosphere of Chengdu, China**

4

5 Kaitao Chen et al.

6

7 *Correspondence to:* Prof. Gehui Wang, Email: [ghwang@geo.ecnu.edu.cn](mailto:ghwang@geo.ecnu.edu.cn)

8

9 The copyright of individual parts of the supplement might differ from the article  
10 licence.

11 **Text S1.** Detailed description of the online measurement by the  
12 IGAC and method accuracy test.

13 Ambient air is sampled through a PM<sub>2.5</sub> sharp-cut cyclone at a flow rate of 16.7  
14 L min<sup>-1</sup>, and then passes sequentially through a wet annular denuder (WAD) where  
15 gaseous compounds are absorbed into pure water, and a scrub and impactor aerosol  
16 collector (SIC) where PM<sub>2.5</sub> are collected and transformed into liquid samples. The  
17 collected gas and aerosol samples, after removal of insoluble species and bubbles, are  
18 injected into an ion chromatography system (ICS-5000+) for determination of  
19 water-soluble inorganic ions and small molecular amines (e.g., methylamine (MA),  
20 dimethylamine (DMA)), while the remaining portions are simultaneously analyzed by  
21 a TOC/TN analyzer (TOC-L CPH).

22 WSOC is determined by difference: total carbon (TC) is measured via  
23 high-temperature (680°C) Pt-catalyzed combustion converting all carbon to CO<sub>2</sub>  
24 detected by non-dispersive infrared (NDIR), yielding water-soluble total carbon  
25 (WSTC); inorganic carbon (IC) is measured after acidification with 25% H<sub>3</sub>PO<sub>4</sub>  
26 converting inorganic carbonates to CO<sub>2</sub> detected by NDIR, yielding water-soluble  
27 inorganic carbon (WSIC); WSOC is calculated as WSTC minus WSIC. Similarly,  
28 WSON is obtained as the difference between water-soluble total nitrogen (WSTN)  
29 measured by combustion and water-soluble inorganic nitrogen (WSIN, mainly  
30 ammonium, nitrate, and nitrite) determined by ion chromatography. Calibration  
31 curves for TC and IC are established using standard solutions of NaHCO<sub>3</sub>, Na<sub>2</sub>CO<sub>3</sub>,  
32 and potassium hydrogen phthalate. The calibration curve for total nitrogen was  
33 created using a KNO<sub>3</sub> standard solution.

34

35 **Text S2.** Calculation of the contributions of the major components  
36 of PM<sub>2.5</sub> to ALWC.

37 Inorganic ALWC was simulated using the ISORROPIA-II thermodynamic model,  
38 constrained by ambient meteorological parameters and measured concentrations of

39 inorganic ions. The contribution of  $(\text{NH}_4)_2\text{SO}_4$  to total ALWC was isolated by  
 40 calculating the difference between the full model prediction and a simulation  
 41 excluding  $(\text{NH}_4)_2\text{SO}_4$  input (i.e., setting  $(\text{NH}_4)_2\text{SO}_4 = 0$ ). Similarly, the contribution  
 42 of  $\text{NH}_4\text{NO}_3$  was derived from the difference in ALWC between simulations performed  
 43 with and without  $\text{NH}_4\text{NO}_3$  (i.e., setting  $\text{NH}_4\text{NO}_3 = 0$ ). The equation for  $\text{ALWC}_{\text{org}}$  is as  
 44 follows (Lv et al., 2022a; Lv et al., 2022b):

$$\text{ALWC}_{\text{org}} = \frac{[\text{OM}]\rho_w}{\rho_{\text{org}}} \frac{\kappa_{\text{org}}}{\frac{1}{\text{RH}} - 1} \quad (\text{S1})$$

45 Where  $[\text{OM}]$  is the concentration of fine particulate organic matter ( $\text{OM} = \text{OC} \times 1.6$ );  
 46  $\rho_w$  and  $\rho_{\text{org}}$  are the density of water ( $\rho_w = 1.0 \text{ g cm}^{-3}$ ) and OM ( $\rho_{\text{org}} = 1.4 \text{ g cm}^{-3}$ ),  
 47 respectively; and  $\kappa_{\text{org}}$  is the hygroscopicity parameter for organic aerosol  
 48 composition ( $\kappa_{\text{org}} = 0.06$ ).

49 **Text S3. The dependencies of amines on pH, ALWC, and T (S-curve**  
 50 **equation derivations)**

### 51 3.1 $\text{CH}_3\text{NH}_2$ – $\text{CH}_3\text{NH}_3^+$ partitioning

52 Here, we show the detailed derivation of equation (4) in that paper. The  
 53 equilibrium between gaseous  $\text{CH}_3\text{NH}_2$  and particle-phase  $\text{CH}_3\text{NH}_3^+$  involves two  
 54 processes: First,  $\text{CH}_3\text{NH}_2$  dissolves into the aqueous phase (assuming the particles are  
 55 liquids). Second, dissolved  $\text{CH}_3\text{NH}_2$  undergoes hydrogenation ( $\text{H}^+$ ) to form  $\text{CH}_3\text{NH}_3^+$ .  
 56 The two processes are reversible and often reach thermodynamic equilibria at  
 57 ambient conditions (RH, T) for fine particles.

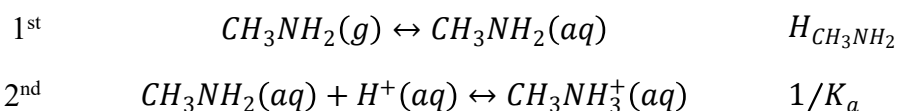

58 for which reaction equilibria are expressed as follows,

$$H_{\text{CH}_3\text{NH}_2} = \gamma_{\text{CH}_3\text{NH}_2} [\text{CH}_3\text{NH}_2] / p_{\text{CH}_3\text{NH}_2} \quad (\text{S2})$$

$$1/K_a = \frac{\gamma_{CH_3NH_3^+} [CH_3NH_3^+]}{\gamma_{CH_3NH_2} [CH_3NH_2] \gamma_{H^+} [H^+]} \quad (S3)$$

59 where,  $H_{CH_3NH_2}$  is  $CH_3NH_2$  Henry's law constant ( $H_{CH_3NH_2} =$   
60  $90.179 \text{ mol atm}^{-1} \text{ kg}^{-1}$ , 298.15 K) (Sander, 2023),  $K_a$  is  $CH_3NH_3^+$  acid  
61 dissociation constant ( $K_a = 2.1878 \times 10^{-11} \text{ mole L}^{-1}$ , 298.15 K) (Ge et al., 2011),  
62  $\gamma_i$  represents activity coefficient,  $p_{CH_3NH_2}$  is partial pressure of  $CH_3NH_2$  in  
63 atmosphere, and  $[x]$  represents aqueous concentrations ( $\text{mole L}^{-1}$ ). Please note that  
64 methylamine is an organic amine classified as a weak base. When methylamine  
65 comes into contact with water, a reaction similar to that between ammonia and water  
66 occurs (Fountoukis and Nenes, 2007). Methylamine can accept a proton ( $H^+$ ) from  
67 water. In this reaction, methylamine acts as a base, causing water to dissociate and  
68 produce hydroxide ions ( $OH^-$ ). The reaction is represented by the equation:

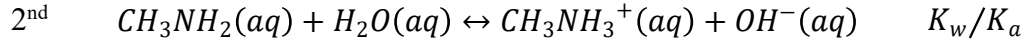

69 where  $K_w$  is water dissociation constant. Equations (S2) and (S3) give the total  
70 dissolved  $CH_3NH_2$  or total particle-phase methylammonium ion ( $[CH_3NH_3^T]$ ) as

$$[CH_3NH_3^T] = [CH_3NH_2] + [CH_3NH_3^+] = H_{CH_3NH_2} p_{CH_3NH_2} \left( \frac{1}{\gamma_{CH_3NH_2}} + \frac{\gamma_{H^+} [H^+]}{\gamma_{CH_3NH_3^+} K_a} \right) \quad (S4)$$

71 Combining with ideal gas law, that is

$$c[CH_3NH_2] = \frac{p_{CH_3NH_2}}{RT} \quad (S5)$$

72 Where  $c[x]$  is concentration per volume of air, R is the gas constant, and T is  
73 the temperature. Therefore, the particle-phase fraction of the methylammonium ion is:

$$\varepsilon(CH_3NH_3^+) = \frac{c(CH_3NH_3^T)}{c(CH_3NH_2) + c(CH_3NH_3^T)} = \frac{[CH_3NH_3^T] W_i}{c(CH_3NH_2) + [CH_3NH_3^T] W_i} \quad (S6)$$

74 where  $W_i$  is the liquid water content of the particles ( $\mu\text{g m}^{-3}$ ; mass per volume of air).

75 Taking equations (S4) and (S5) into (S6), we get  $\varepsilon(CH_3NH_3^T)$  as

$$\varepsilon(\text{CH}_3\text{NH}_3^+) = \frac{\left(\frac{\gamma_{\text{H}^+}[\text{H}^+]}{\gamma_{\text{CH}_3\text{NH}_3^+} + \frac{K_a}{\gamma_{\text{CH}_3\text{NH}_2}}}\right) \frac{H_{\text{CH}_3\text{NH}_2} W_i RT}{K_a}}{1 + \left(\frac{\gamma_{\text{H}^+}[\text{H}^+]}{\gamma_{\text{CH}_3\text{NH}_3^+} + \frac{K_a}{\gamma_{\text{CH}_3\text{NH}_2}}}\right) \frac{H_{\text{CH}_3\text{NH}_2} W_i RT}{K_a}} \quad (\text{S7})$$

76 To be consistent with the SI units and substitute  $[\text{H}^+] = 10^{-\text{pH}}$ , equation (S7) is  
77 presented as:

$$\varepsilon(\text{CH}_3\text{NH}_3^+) = \frac{\left(\frac{\gamma_{\text{H}^+} 10^{-\text{pH}} + \frac{K_a}{\gamma_{\text{CH}_3\text{NH}_2}}\right) \frac{H_{\text{CH}_3\text{NH}_2} W_i RT \times 0.987 \times 10^{-14}}{K_a}}{1 + \left(\frac{\gamma_{\text{H}^+} 10^{-\text{pH}} + \frac{K_a}{\gamma_{\text{CH}_3\text{NH}_2}}\right) \frac{H_{\text{CH}_3\text{NH}_2} W_i RT \times 0.987 \times 10^{-14}}{K_a}} \quad (\text{S8})$$

78 Please note that  $0.987 \times 10^{-14}$  is derived from the use of  $R =$   
79  $8.314 \text{ m}^3 \text{ Pa K}^{-1} \text{ mole}^{-1}$ , so 1 atm and 1 L must be converted to 1 Pa and 1  $\mu\text{g}$ ,  
80 respectively.

### 81 **3.2 (CH<sub>3</sub>)<sub>2</sub>NH –(CH<sub>3</sub>)<sub>2</sub>NH<sub>2</sub><sup>+</sup> partitioning**

82 Following the same derivation procedure as CH<sub>3</sub>NH<sub>2</sub> –CH<sub>3</sub>NH<sub>3</sub><sup>+</sup> partitioning, we  
83 have  $\varepsilon((\text{CH}_3)_2\text{NH}_2^+)$  as

$$\varepsilon((\text{CH}_3)_2\text{NH}_2^+) = \frac{\left(\frac{\gamma_{\text{H}^+} 10^{-\text{pH}} + \frac{K_a}{\gamma_{(\text{CH}_3)_2\text{NH}}}\right) \frac{H_{(\text{CH}_3)_2\text{NH}} W_i RT \times 0.987 \times 10^{-14}}{K_a}}{1 + \left(\frac{\gamma_{\text{H}^+} 10^{-\text{pH}} + \frac{K_a}{\gamma_{(\text{CH}_3)_2\text{NH}}}\right) \frac{H_{(\text{CH}_3)_2\text{NH}} W_i RT \times 0.987 \times 10^{-14}}{K_a}} \quad (\text{S9})$$

84 where,  $H_{(\text{CH}_3)_2\text{NH}}$  is (CH<sub>3</sub>)<sub>2</sub>NH Henry's law constant ( $H_{(\text{CH}_3)_2\text{NH}} = 56.742 \text{ mol atm}^{-1}$   
85  $\text{kg}^{-1}$ , 298.15 K) (Sander, 2023),  $K_a$  is (CH<sub>3</sub>)<sub>2</sub>NH<sub>2</sub><sup>+</sup> acid dissociation constant ( $K_a =$   
86  $1.8621 \times 10^{-11} \text{ mole L}^{-1}$ , 298.15 K) (Ge et al., 2011),  $\gamma_i$  represents activity  
87 coefficient.

88 **Table S1.** Interannual statistics of PM<sub>2.5</sub> and its chemical components in the SCB  
 89 during winter ( $\mu\text{g m}^{-3}$ ).

| Year | PM <sub>2.5</sub> | SO <sub>4</sub> <sup>2-</sup> | NO <sub>3</sub> <sup>-</sup> | NH <sub>4</sub> <sup>+</sup> | Cl <sup>-</sup> | OM <sup>a</sup>         | References            |
|------|-------------------|-------------------------------|------------------------------|------------------------------|-----------------|-------------------------|-----------------------|
| 2012 | 108               | 22                            | 19                           | 16                           | —               | —                       | (Chen et al., 2019)   |
| 2015 | 115.41 ± 65.28    | 25.0                          | 22.7                         | 15.1                         | —               | 45.2                    | (Kong et al., 2020)   |
| 2016 | 195.8 ± 91.0      | 17.5                          | 25.5                         | 15.8                         | 4.9             | 60                      | (Zhang et al., 2024a) |
| 2017 | 153.9 ± 63.1      | 11.3                          | 23                           | 12.5                         | 3.9             | 48                      | (Zhang et al., 2024a) |
| 2018 | 119.8 ± 32.0      | 8.8                           | 17.5                         | 10.8                         | 1.4             | 35                      | (Zhang et al., 2024a) |
| 2020 | 96.1 ± 39.3       | 7.5                           | 18.5                         | 8.2                          | 1.7             | 29                      | (Zhang et al., 2024a) |
| 2021 | 98.5 ± 38.7       | 10 ± 4.2                      | 29 ± 14                      | 15.1 ± 6.4                   | 5.2 ± 4.1       | 39.2 ± 3.9 <sup>b</sup> | (Bao et al., 2023)    |
| 2023 | 95.6 ± 28.7       | 8.8                           | 21.0                         | 7.5                          | 1.7             | 33.7                    | (Zhang et al., 2024b) |
| 2024 | 76 ± 38           | 4.9 ± 2.0                     | 16.7 ± 8.3                   | 7.2 ± 3.0                    | 1.3 ± 1.0       | 21.1 ± 9.6              | this study            |

90 <sup>a</sup>OM = OC × 1.6. <sup>b</sup>Obtained via ToF-ACSM.

91 **Table S2.** Daytime and nighttime concentrations and gas-particle partitioning of  
 92 WSON during clean, transition, and pollution haze periods ( $\mu\text{g m}^{-3}$ ).

|                      |                                | Daytime |        |                 |           | Nighttime |        |      |           | p <sup>b</sup> |
|----------------------|--------------------------------|---------|--------|-----------------|-----------|-----------|--------|------|-----------|----------------|
|                      |                                | Mean    | Median | SD <sup>a</sup> | Range     | Mean      | Median | SD   | Range     |                |
| Clean<br>Period      | WSON <sub>g</sub> <sup>c</sup> | 0.63    | 0.46   | 0.56            | 0.13–1.46 | 0.68      | 0.57   | 0.53 | 0.06–1.71 | p > 0.05       |
|                      | WSON <sub>p</sub> <sup>c</sup> | 0.76    | 0.78   | 0.27            | 0.36–1.09 | 1.13      | 0.82   | 1.11 | 0.11–4.35 | p > 0.05       |
|                      | F <sub>WSON</sub> <sup>d</sup> | 0.62    | 0.67   | 0.25            | 0.29–0.88 | 0.61      | 0.61   | 0.07 | 0.51–0.72 | p > 0.05       |
| Transition<br>Period | WSON <sub>g</sub>              | 1.23    | 1.18   | 0.79            | 0.33–3.91 | 0.76      | 0.63   | 0.52 | 0.14–2.15 | p < 0.01       |
|                      | WSON <sub>p</sub>              | 1.68    | 1.47   | 0.94            | 0.16–4.90 | 1.42      | 1.25   | 0.66 | 0.12–2.90 | p > 0.05       |
|                      | F <sub>WSON</sub>              | 0.60    | 0.64   | 0.15            | 0.28–0.87 | 0.71      | 0.71   | 0.12 | 0.53–0.90 | p < 0.01       |
| Pollution<br>Period  | WSON <sub>g</sub>              | 1.85    | 1.52   | 1.25            | 0.21–5.82 | 1.05      | 0.86   | 0.74 | 0.09–3.17 | p < 0.001      |
|                      | WSON <sub>p</sub>              | 3.45    | 3.74   | 1.42            | 0.33–6.19 | 2.71      | 2.48   | 1.31 | 0.78–6.34 | p < 0.01       |
|                      | F <sub>WSON</sub>              | 0.69    | 0.69   | 0.13            | 0.42–0.90 | 0.76      | 0.75   | 0.12 | 0.42–0.98 | p < 0.01       |

93 <sup>a</sup> Standard Deviation. <sup>b</sup> Statistical Significance (p-values < 0.05 considered statistically  
 94 significant). <sup>c</sup> Concentration of water-soluble organic nitrogen (WSON) in the  
 95 gas-phase (g) and particulate-phase (p). <sup>d</sup> Gas-particle partitioning of WSON.

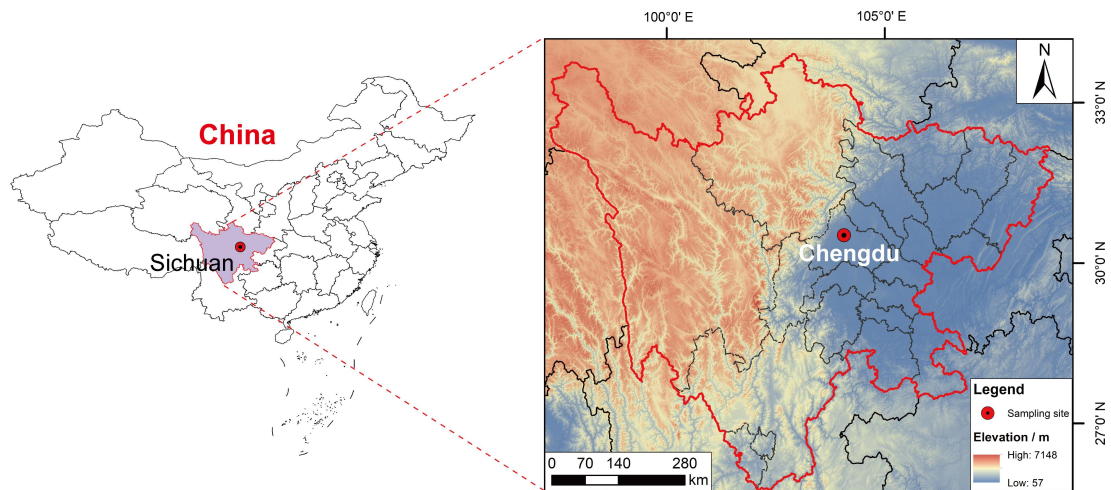

96

97 **Figure S1.** Geographic location of the sampling site in Sichuan Basin (SCB), China.

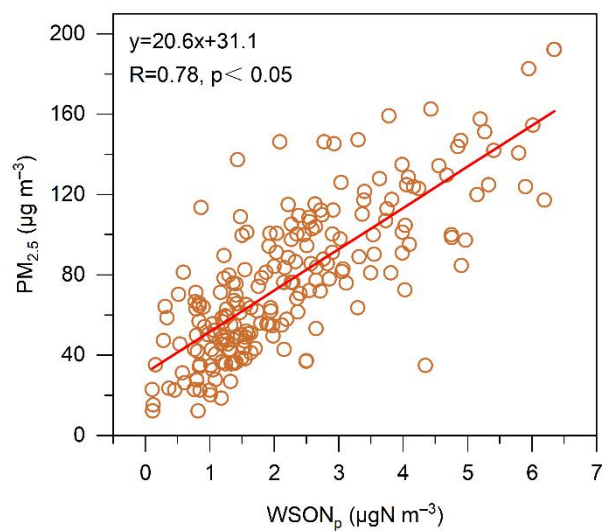

98

99 **Figure S2.** Correlation Scatter Plot Between WSON<sub>p</sub> and PM<sub>2.5</sub>.

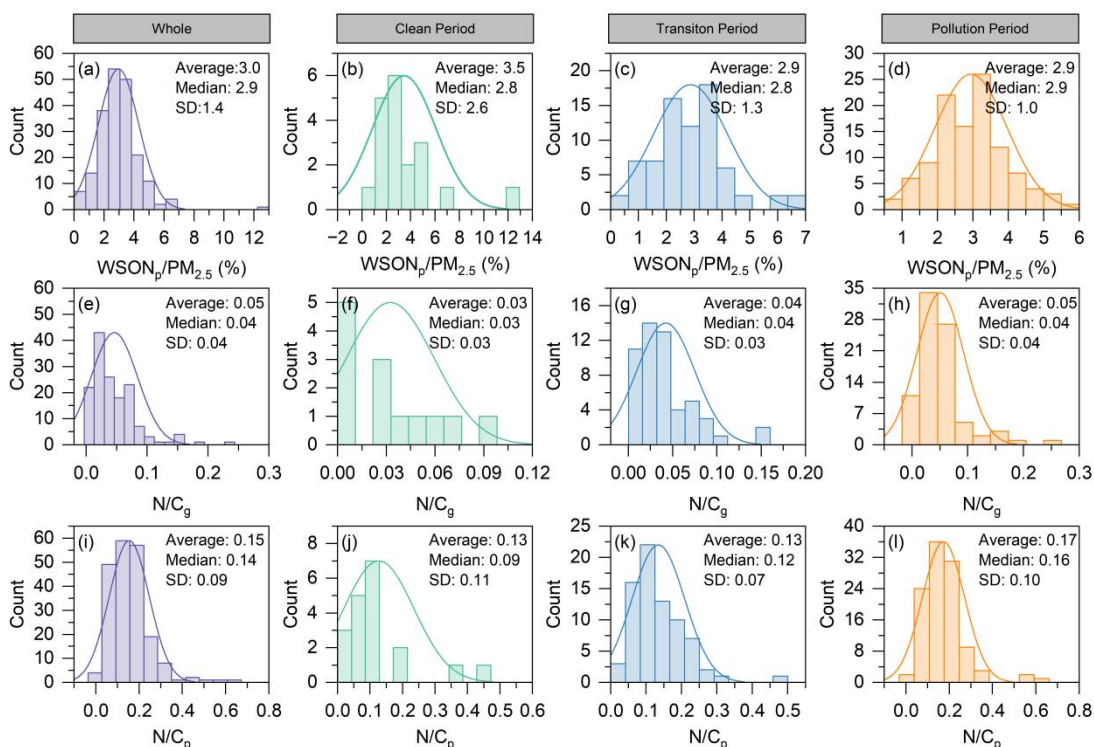

100

101 **Figure S3.** Frequency distribution characteristics of WSON contribution and nitrogen  
 102 to carbon (WSON/WSOC) ratios in PM<sub>2.5</sub> during different periods. (a–d) Mass  
 103 percentage of water-soluble organic nitrogen in PM<sub>2.5</sub> (WSON<sub>p</sub>/PM<sub>2.5</sub>, %); (e–h)  
 104 Molar ratio of nitrogen to carbon in the gas phase (WSON/WSOC<sub>g</sub>); (i–l) Molar ratio  
 105 of nitrogen to carbon in the particle phase (WSON/WSOC<sub>p</sub>). The solid lines represent  
 106 Gaussian distribution fits to the data. The average, median and standard deviation (SD)  
 107 for each dataset are indicated in the panels.

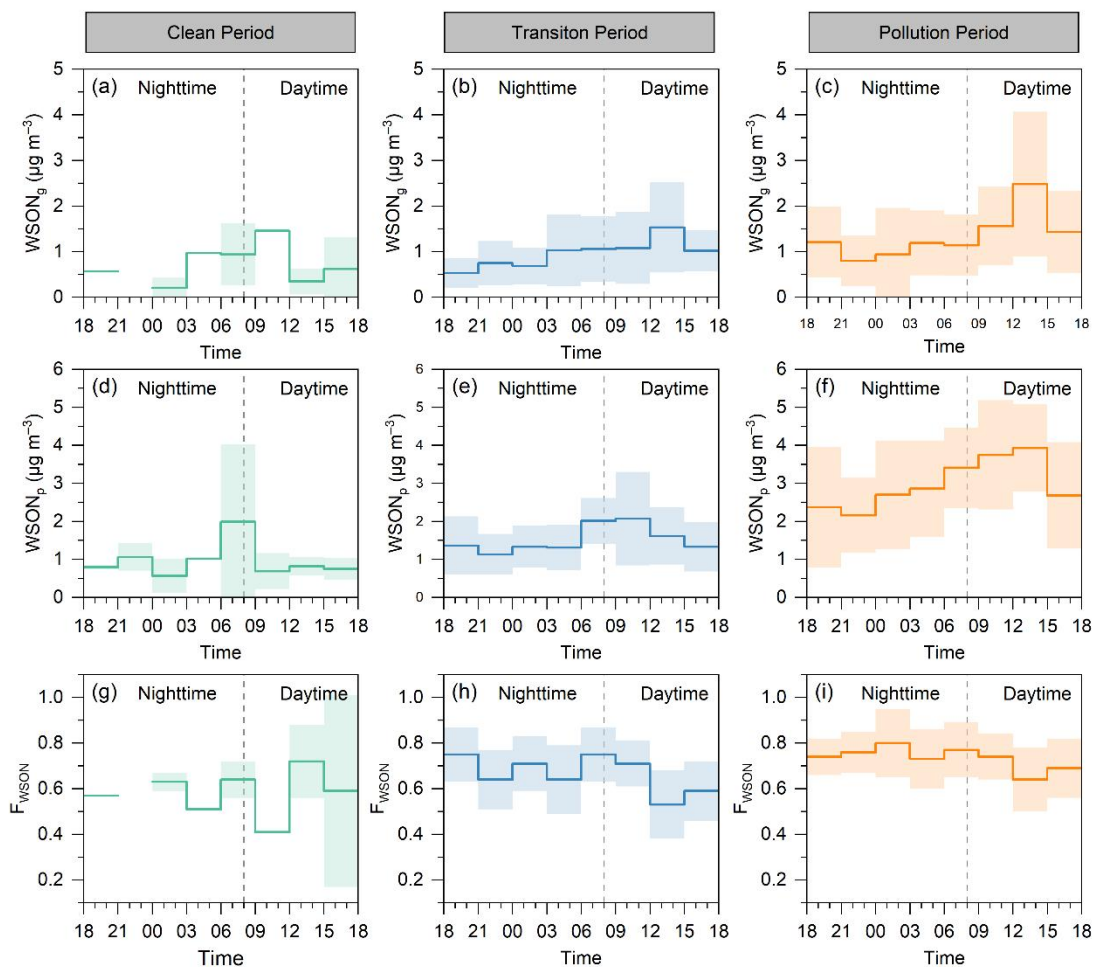

108

109 **Figure S4.** Diurnal variations of WSON and gas-particle partitioning during clean,  
 110 transition, and pollution periods. Here, a, b, c and d, e, f represent the diurnal  
 111 variation concentrations of gas and particle phase, respectively, and g, h, i represent  
 112 the partition coefficient of WSON ( $F_{WSON}$ ). The time shown is Beijing Time.

113

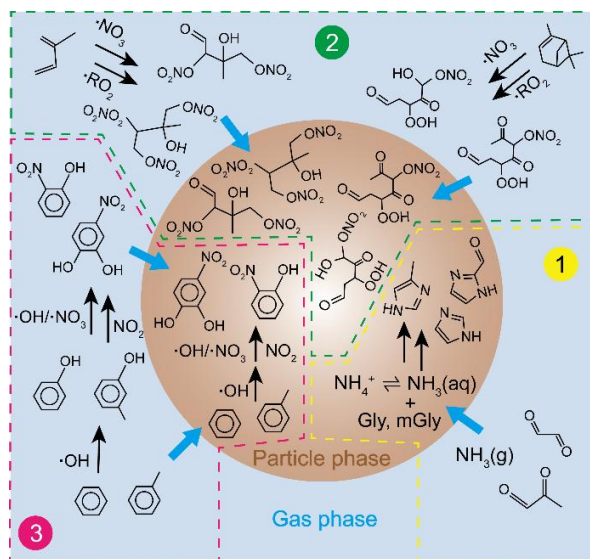

114

115 **Figure S5.** Secondary generation path of WSON (Zhang et al., 2026; Xiao et al., 2025;  
 116 Vione et al., 2004; Yuan et al., 2016; Wang et al., 2019; Chen et al., 2025; Liu et al.,  
 117 2023).

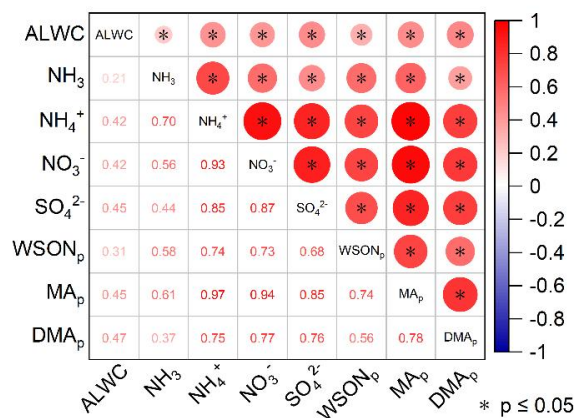

118

119 **Figure S6.** Factors affecting the concentration of WSON<sub>p</sub>, methylamine<sub>p</sub> (MA<sub>p</sub>) and  
 120 dimethylamine<sub>p</sub> (DMA<sub>p</sub>) in the SCB region of China.

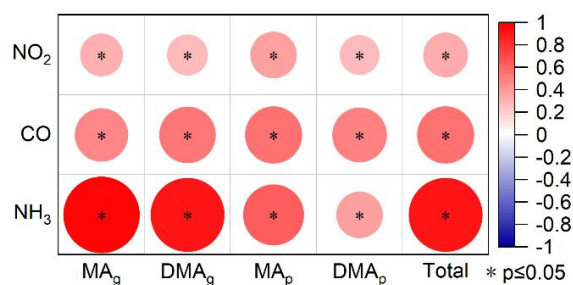

121

122 **Figure S7.** Pearson correlation matrix of gaseous and particulate methylamine (MA)  
 123 and dimethylamine (DMA) with NH<sub>3</sub>, CO, and NO<sub>2</sub> during the wintertime  
 124 observation in the SCB.

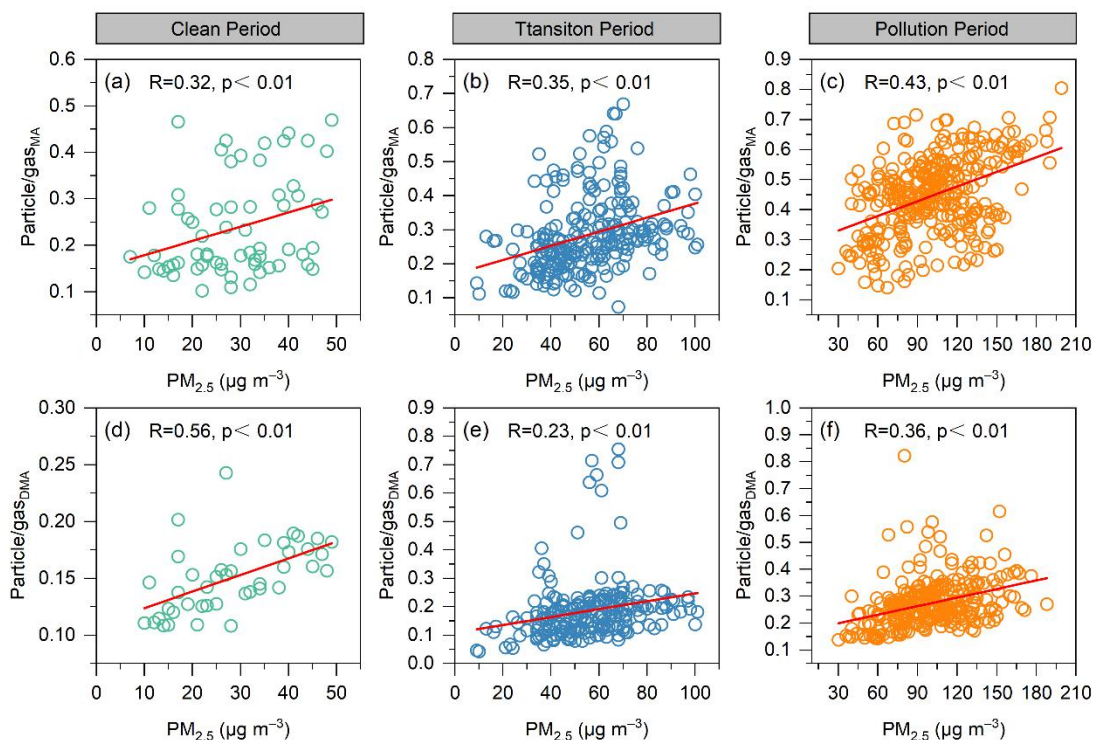

125

126 **Figure S8.** Ratio in particle and gas phase signal of the methylamine (MA) and  
 127 dimethylamine (DMA)–versus total  $PM_{2.5}$  concentration ( $\mu g m^{-3}$ ) for all observations  
 128 during the campaign. According to equation (10), the slope of a linear fit will provide  
 129  $K_i$  for the selected constituent.

130

131 **References**

- 132 Bao, Z., Zhang, X., Li, Q., Zhou, J., Shi, G., Zhou, L., Yang, F., Xie, S., Zhang, D., Zhai, C., Li, Z.,  
133 Peng, C., and Chen, Y.: Measurement report: Intensive biomass burning emissions and rapid  
134 nitrate formation drive severe haze formation in the Sichuan Basin, China – insights from  
135 aerosol mass spectrometry, *Atmos. Chem. Phys.*, 23, 1147-1167,  
136 <https://doi.org/10.5194/acp-23-1147-2023>, 2023.
- 137 Chen, Y., Xie, S.-d., Luo, B., and Zhai, C.: Characteristics and Sources of Water-Soluble Ions in  
138 PM<sub>2.5</sub> in the Sichuan Basin, China, *Atmosphere*, 10, <https://doi.org/10.3390/atmos10020078>,  
139 2019.
- 140 Chen, Y., Xia, M., Zheng, P., Li, Y., Zou, Z., Tong, S., Li, K., Feng, X., Hui, L., Yuan, Q., Li, J.,  
141 Yu, J. Z., Lee, S., Wang, T., and Wang, Z.: Complex gas-particle partitioning of  
142 nitro-phenolic compounds: field-based insights and determination of apparent activity  
143 coefficient, *npj Clim. Atmos. Sci.*, 8, <https://doi.org/10.1038/s41612-025-01156-z>, 2025.
- 144 Fountoukis, C., and Nenes, A.: ISORROPIA II: a computationally efficient thermodynamic  
145 equilibrium model for K<sup>+</sup> –Ca<sup>2+</sup> –Mg<sup>2+</sup> –NH<sub>4</sub><sup>+</sup> –Na<sup>+</sup> –SO<sub>4</sub><sup>2-</sup> –NO<sub>3</sub><sup>-</sup> –Cl<sup>-</sup> –H<sub>2</sub>O aerosols,  
146 *Atmos. Chem. Phys.*, 7, 4639–4659, <https://doi.org/10.5194/acp-7-4639-2007>, 2007.
- 147 Ge, X., Wexler, A. S., and Clegg, S. L.: Atmospheric amines – Part II. Thermodynamic properties  
148 and gas/particle partitioning, *Atmos. Environ.*, 45, 561-577,  
149 <https://doi.org/10.1016/j.atmosenv.2010.10.013>, 2011.
- 150 Kong, L., Tan, Q., Feng, M., Qu, Y., An, J., Liu, X., Cheng, N., Deng, Y., Zhai, R., and Wang, Z.:  
151 Investigating the characteristics and source analyses of PM<sub>2.5</sub> seasonal variations in Chengdu,  
152 Southwest China, *Chemosphere*, 243, <https://doi.org/10.1016/j.chemosphere.2019.125267>,  
153 2020.
- 154 Liu, X., Wang, H., Wang, F., Lv, S., Wu, C., Zhao, Y., Zhang, S., Liu, S., Xu, X., Lei, Y., and  
155 Wang, G.: Secondary Formation of Atmospheric Brown Carbon in China Haze: Implication  
156 for an Enhancing Role of Ammonia, *Environ. Sci. Technol.*, 57, 11163-11172,  
157 <https://doi.org/10.1021/acs.est.3c03948>, 2023.
- 158 Lv, S., Wang, F., Wu, C., Chen, Y., Liu, S., Zhang, S., Li, D., Du, W., Zhang, F., Wang, H., Huang,  
159 C., Fu, Q., Duan, Y., and Wang, G.: Gas-to-Aerosol Phase Partitioning of Atmospheric  
160 Water-Soluble Organic Compounds at a Rural Site in China: An Enhancing Effect of NH<sub>3</sub> on  
161 SOA Formation, *Environ. Sci. Technol.*, 56, 3915-3924,  
162 <https://doi.org/10.1021/acs.est.1c06855>, 2022a.
- 163 Lv, S., Wu, C., Wang, F., Liu, X., Zhang, S., Chen, Y., Zhang, F., Yang, Y., Wang, H., Huang, C.,  
164 Fu, Q., Duan, Y., and Wang, G.: Nitrate-Enhanced Gas-to-Particle-Phase Partitioning of  
165 Water-Soluble Organic Compounds in Chinese Urban Atmosphere: Implications for  
166 Secondary Organic Aerosol Formation, *Environ. Sci. Technol. Lett.*, 10, 14-20,  
167 <https://doi.org/10.1021/acs.estlett.2c00894>, 2022b.
- 168 Sander, R.: Compilation of Henry's law constants (version 5.0.0) for water as solvent, *Atmos.*  
169 *Chem. Phys.*, 23, 10901-12440, <https://doi.org/10.5194/acp-23-10901-2023>, 2023.

170 Vione, D., Maurino, V., Minero, C., Lucchiari, M., and Pelizzetti, E.: Nitration and hydroxylation  
171 of benzene in the presence of nitrite/nitrous acid in aqueous solution, *Chemosphere*, 56,  
172 1049-1059, <https://doi.org/10.1016/j.chemosphere.2004.05.027>, 2004.

173 Wang, Y., Hu, M., Wang, Y., Zheng, J., Shang, D., Yang, Y., Liu, Y., Li, X., Tang, R., Zhu, W., Du,  
174 Z., Wu, Y., Guo, S., Wu, Z., Lou, S., Hallquist, M., and Yu, J. Z.: The formation of  
175 nitro-aromatic compounds under high NO<sub>2</sub> and anthropogenic VOC conditions in urban Beijing, China, *Atmos. Chem. Phys.*, 19, 7649-7665,  
176 <https://doi.org/10.5194/acp-19-7649-2019>, 2019.

178 Xiao, B., Wang, G., Li, Z., Li, R., Liang, C., Wang, H., Zhang, S., Wu, C., Li, R., Zhang, F., Zhang,  
179 R., Wu, Y., and Zhang, L.: High Contribution of Secondary Formation to Brown Carbon in  
180 China Humid Haze: Enhancing Role of Ammonia and Amines, *Environ. Sci. Technol.*, 59,  
181 27530-27540, <https://doi.org/10.1021/acs.est.5c13436>, 2025.

182 Yuan, B., Liggiio, J., Wentzell, J., Li, S.-M., Stark, H., Roberts, J. M., Gilman, J., Lerner, B.,  
183 Warneke, C., Li, R., Leithead, A., Osthoff, H. D., Wild, R., Brown, S. S., and de Gouw, J. A.:  
184 Secondary formation of nitrated phenols: insights from observations during the Uintah Basin  
185 Winter Ozone Study (UBWOS) 2014, *Atmos. Chem. Phys.*, 16, 2139-2153,  
186 <https://doi.org/10.5194/acp-16-2139-2016>, 2016.

187 Zhang, J., Li, J., Su, Y., Chen, C., Chen, L., Huang, X., Wang, F., Huang, Y., and Wang, G.:  
188 Interannual evolution of the chemical composition, sources and processes of PM<sub>2.5</sub> in  
189 Chengdu, China: Insights from observations in four winters, *J. Environ. Sci.*, 138, 32-45,  
190 <https://doi.org/10.1016/j.jes.2023.02.055>, 2024a.

191 Zhang, J., Su, Y., Chen, C., Guo, W., Tan, Q., Feng, M., Song, D., Jiang, T., Chen, Q., Li, Y., Li,  
192 W., Wang, Y., Huang, X., Han, L., Wu, W., and Wang, G.: Chemical composition, sources  
193 and formation mechanism of urban PM<sub>2.5</sub> in Southwest China: a case study at the beginning  
194 of 2023, *Atmos. Chem. Phys.*, 24, 2803-2820, <https://doi.org/10.5194/acp-24-2803-2024>,  
195 2024b.

196 Zhang, S., Wang, G., Xu, X., Liu, Y., Nie, W., Chen, L., Li, R., Gao, Y., Li, R., Wu, C., Zhang, J.,  
197 and Prevot, A. S. H.: Unappreciated Role of Photochemical Aging of Biogenic Organic  
198 Nitrates in Atmospheric Ozone Formation, *Environ. Sci. Technol.*,  
199 <https://doi.org/10.1021/acs.est.5c11688>, 2026.

200
